# Supplementary material for: The crystal structure and thermal expansion of novel substitutionally disordered Ca10TM0.5(VO4)7 (TM = Co, Cu) orthovanadates
Source: Royal Society of Chemistry journal article supplement (doi:10.1039/d1dt02446a), 2021-01-01
Supplement: d1dt02446a2.pdf [file d1dt02446a2.pdf]

## Supporting information

### Crystal structure and thermal expansion of novel substitutionally disordered $\text{Ca}_{10}\text{TM}_{0.5}(\text{VO}_4)_7$ (TM=Co, Cu) orthovanadates

Houri S. Rahimi Mosafer, Wojciech Paszkowicz, Roman Minikayev, Mirosław Kozłowski, Ryszard Diduszko and Marek Berkowski

Institute of physics, Polish academy of sciences, Warsaw, Poland

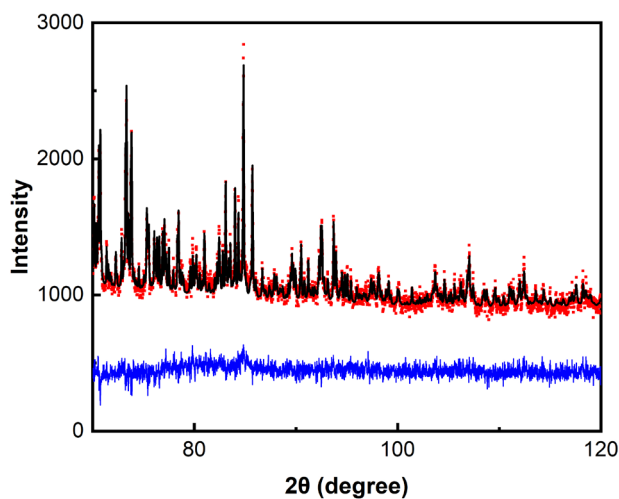

Figure S1-a. Rietveld refinement of  $\text{Ca}_{10}\text{Co}_{0.5}(\text{VO}_4)_7$  – angles between 70 and 120 ( $2\theta^\circ$ ).

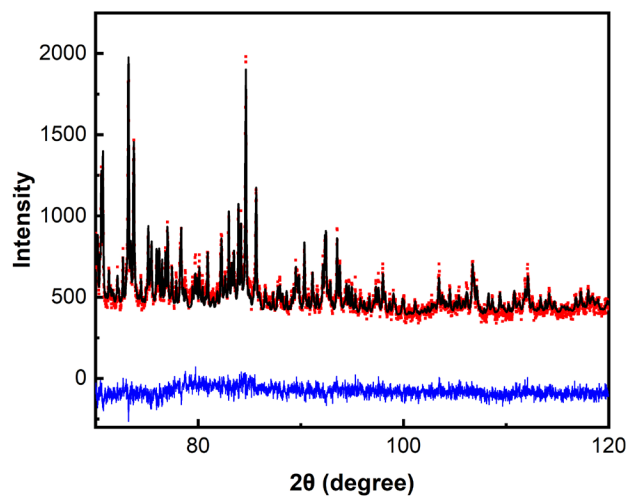

Figure S1-b. Rietveld refinement of  $\text{Ca}_{10}\text{Cu}_{0.5}(\text{VO}_4)_7$  – angles between 70 and 120 ( $2\theta^\circ$ ).

**Table S1. Dependence of lattice parameters and unit-cell volume on temperature for  $\text{Ca}_{10}\text{Co}_{0.5}(\text{VO}_4)_7$  and  $\text{Ca}_{10}\text{Cu}_{0.5}(\text{VO}_4)_7$  in the 300–810 K – numerical data of figure 4.**

| T (K) | $\text{Ca}_{10}\text{Co}_{0.5}(\text{VO}_4)_7$ |             |           |                       | $\text{Ca}_{10}\text{Cu}_{0.5}(\text{VO}_4)_7$ |             |           |                       |
|-------|------------------------------------------------|-------------|-----------|-----------------------|------------------------------------------------|-------------|-----------|-----------------------|
|       | $a$ (Å)                                        | $c$ (Å)     | $c/a$     | $V$ (Å <sup>3</sup> ) | $a$ (Å)                                        | $c$ (Å)     | $c/a$     | $V$ (Å <sup>3</sup> ) |
| 300   | 10.7814 (3)                                    | 37.8230(10) | 3.5082(1) | 3807.50(16)           | 10.7876(3)                                     | 37.9016(10) | 3.5135(1) | 3819.74(17)           |
| 325   | 10.7848 (2)                                    | 37.8341(9)  | 3.5081(1) | 3810.97(15)           | 10.7894(3)                                     | 37.9068(11) | 3.5133(1) | 3821.56(18)           |
| 379   | 10.7935 (2)                                    | 37.8603(10) | 3.5077(1) | 3819.76(16)           | 10.7983(2)                                     | 37.9373(10) | 3.5133(1) | 3830.95(16)           |
| 434   | 10.8018(2)                                     | 37.8867(9)  | 3.5074(1) | 3828.30(14)           | 10.8057(3)                                     | 37.9610(11) | 3.5130(1) | 3838.63(18)           |
| 489   | 10.8104(2)                                     | 37.9137(9)  | 3.5071(1) | 3837.18(14)           | 10.8151(3)                                     | 37.9922(10) | 3.5129(1) | 3848.47(17)           |
| 543   | 10.8192(2)                                     | 37.9394(9)  | 3.5067(1) | 3846.04(14)           | 10.8232(3)                                     | 38.0168(13) | 3.5125(1) | 3856.70(21)           |
| 598   | 10.8286(2)                                     | 37.9683(8)  | 3.5063(1) | 3855.66(13)           | 10.8320(3)                                     | 38.0458(11) | 3.5124(1) | 3865.93(18)           |
| 652   | 10.8373(2)                                     | 37.9949(8)  | 3.5059(1) | 3864.56(14)           | 10.8418(3)                                     | 38.0770(10) | 3.5120(1) | 3876.13(17)           |
| 706   | 10.8462(2)                                     | 38.0216(9)  | 3.5055(1) | 3873.61(14)           | 10.8510(3)                                     | 38.1063(10) | 3.5118(1) | 3885.69(16)           |
| 759   | 10.8552(2)                                     | 38.0502(9)  | 3.5053(1) | 3882.93(14)           | 10.8587(3)                                     | 38.1319(12) | 3.5116(1) | 3893.83(19)           |
| 810   | 10.8645(2)                                     | 38.0807(9)  | 3.5051(1) | 3892.70(15)           | 10.8676(3)                                     | 38.1596(10) | 3.5113(1) | 3903.00(18)           |

**Table S2. Fitted coefficients of equation  $y=A+BT+C/T$  approximating, in the 300–800 K range, the temperature runs of lattice parameters and unit-cell volume for  $\text{Ca}_{10}\text{Co}_{0.5}(\text{VO}_4)_7$  and  $\text{Ca}_{10}\text{Cu}_{0.5}(\text{VO}_4)_7$**

|   | $\text{Ca}_{10}\text{Co}_{0.5}(\text{VO}_4)_7$ |          |            |           | $\text{Ca}_{10}\text{Cu}_{0.5}(\text{VO}_4)_7$ |          |            |           |
|---|------------------------------------------------|----------|------------|-----------|------------------------------------------------|----------|------------|-----------|
|   | $a$                                            | $c$      | $c/a$      | $V$       | $a$                                            | $c$      | $c/a$      | $V$       |
| A | 10.71695                                       | 37.63057 | 3.51122    | 3742.1742 | 10.72361                                       | 37.69204 | 3.51481    | 3749.3911 |
| B | 1.75E-04                                       | 5.37E-04 | -7.1914E-6 | 0.17978   | 1.73E-04                                       | 5.60E-04 | -4.2376E-6 | 0.18303   |
| C | 3.51139                                        | 9.45313  | -0.25301   | 3421.311  | 3.28548                                        | 11.678   | 0.02022    | 4425.6472 |

**Table S3. Fitted coefficients of linear equation  $y=A+r>+B$  approximating the lattice parameters and unit-cell volume for whitlockite related materials, as graphically presented in Fig. 6.**

|   | $a$            |               | $c$            |               | $V/V_0$ |
|---|----------------|---------------|----------------|---------------|---------|
|   | orthophosphate | orthovanadate | orthophosphate | orthovanadate |         |
| A | 0.02763        | 0.0149        | 0.01438        | 0.0289        | 0.02256 |
| B | 0.97235        | 0.9851        | 0.98562        | 0.9711        | 0.97742 |

**Table S4. Present and reported volume of unsubstituted and substituted orthophosphate and orthovanadate whitlockite related materials with partial or full substitution of Ca at M5 site by divalent transition-metal ions Co, Ni and Cu – numerical data of figure 6-d.**

| $\text{Ca}_{10.5-x}\text{M}_x(\text{XO}_4)_7$ | $x$  | $\text{M}^{2+}$  | Volume ( $\text{\AA}^3$ ) | reference |
|-----------------------------------------------|------|------------------|---------------------------|-----------|
| $\text{Ca}_{10.5-x}\text{M}_x(\text{PO}_4)_7$ | 0    | -                | 3527(1)                   | 1         |
|                                               | 0.35 | $\text{Ni}^{2+}$ | 3489.22(9)                | 2         |
|                                               | 0.35 | $\text{Cu}^{2+}$ | 3500.48(7)                | 2         |
|                                               | 0.5  | $\text{Cu}^{2+}$ | 3487.1(8)                 | 3         |
|                                               | 0.5  | $\text{Cu}^{2+}$ | 3485(1)                   | 4         |
|                                               | 1    | $\text{Co}^{2+}$ | 3449.2(1)                 | 5         |
|                                               | 1    | $\text{Cu}^{2+}$ | 3463.8(9)                 | 6         |
| $\text{Ca}_{10.5-x}\text{M}_x(\text{VO}_4)_7$ | 0    | -                | 3847(2)                   | 7         |
|                                               | 0.5  | $\text{Co}^{2+}$ | 3806.67(4)                | This work |
|                                               | 0.5  | $\text{Cu}^{2+}$ | 3819.23(4)                | This work |

References:

- 1 B. Dickens, L. W. Schroeder and W. E. Brown, *J. Solid State Chem.*, 1974, **10**, 232–248.
- 2 A. Altomare, R. Rizzi, M. Rossi, A. El Khouri, M. Elaammani, V. Paterlini, G. Della Ventura and F. Capitelli, *Crystals*, 2019, **9**, 288.
- 3 A. A. Belik, O. V Yanov and B. I. Lazoryak, *Mater. Res. Bull.*, 2001, **36**, 1863–1871.
- 4 A. Benarafa, M. Kacimi, G. Coudurier and M. Ziyad, *Appl. Catal. A Gen.*, 2000, **196**, 25–35.
- 5 A. . Belik, V. . Morozov, S. . Khasanov and B. . Lazoryak, *Mater. Res. Bull.*, 1998, **33**, 987–995.
- 6 B. I. Lazoryak, N. Khan, V. A. Morozov, A. A. Belik and S. S. Khasanov, *J. Solid State Chem.*, 1999, **145**, 345–355.
- 7 R. Gopal and C. Calvo, *Z. Krist.*, 1973, **137**, 67–85.
